# Supplementary material for: Comparison of hydrophilic and hydrophobic deep eutectic solvents for pretreatment determination of sulfonamides from aqueous environments
Source: Royal Society of Chemistry journal article supplement (doi:10.1039/c9ay02244a), 2019-01-01
Supplement: c9ay02244a1.pdf [file c9ay02244a1.pdf]

**Comparison of hydrophilic and hydrophobic deep eutectic  
solvents for pretreatment determination of sulfonamides from  
aqueous environments**

**Yuxin Ma, Qi Wang and Tao Zhu\***

*Tianjin Key Laboratory of Organic Solar Cells and Photochemical Conversion,  
School of Chemistry and Chemical Engineering, Tianjin University of Technology,  
Tianjin 300384, China*

**Supporting Information**

---

\* Address correspondence to Tao Zhu, Tianjin Key Laboratory of Organic Solar Cells and Photochemical Conversion, School of Chemistry and Chemical Engineering, Tianjin University of Technology, Tianjin 300384, China. E-mail: zhutao@tjut.edu.cn



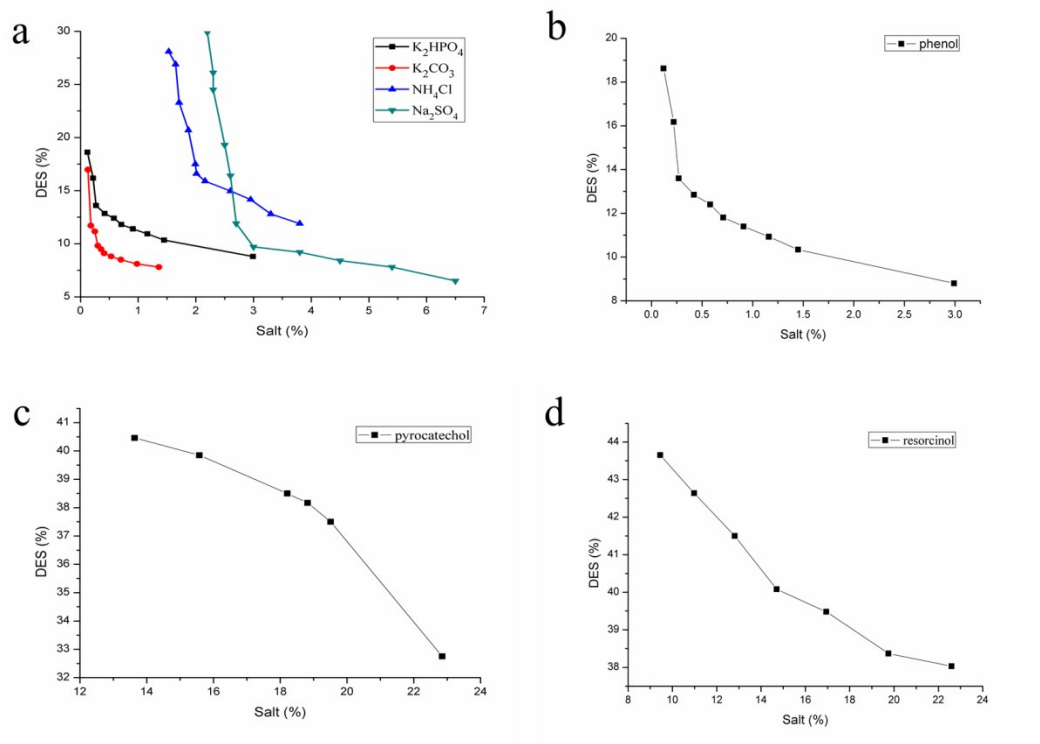

Fig. S2 Phase diagrams of ATPSs at room temperature ((a) ATPSs composed of ChCl-Ph and various salts; (b) ATPSs composed of  $K_2HPO_4$  and ChCl-Ph; (c) ATPSs composed of  $K_2HPO_4$  and ChCl-Py; (d) ATPSs composed of  $K_2HPO_4$  and ChCl-Re)
